# Supplementary material for: Cu–Au alloy nanostructures coated with aptamers: a simple, stable and highly effective platform for in vivo cancer theranostics
Source: Royal Society of Chemistry journal article supplement (doi:10.1039/c5nr07017a), 2015-12-23
Supplement: c5nr07017a1.pdf [file c5nr07017a1.pdf]

## Supporting Information

### **Cu-Au alloy nanostructures coated with aptamers: a facile, stable and highly-effective platform for *in vivo* cancer theranostics**

*Xiaosheng Ye, Hui Shi,<sup>‡</sup> Xiaoxiao He, Yanru Yu, Dinggeng He, Jinlu Tang, Yanli Lei and Kemin Wang\**

State Key Laboratory of Chemo/Biosensing and Chemometrics, College of Chemistry and Chemical Engineering, College of Biology, Key Laboratory for Bio-Nanotechnology and Molecular Engineering of Hunan Province, Hunan University, Changsha 410082, P. R. China.

**Table S1.** List of the DNA sequences used in the experiments.

| <b>DNA</b>   | <b>Sequence</b>                                                                           |
|--------------|-------------------------------------------------------------------------------------------|
| Cy5-Sgc8c-SH | 5'-ATC TAA CTG CTG CGC CGC CGG GAA AAT-Cy5-ACT GTA<br>CGG TTA GA (T) <sub>15</sub> -SH-3' |
| Cy5-Lib-SH   | 5'-(NNN) <sub>8</sub> NNT-Cy5-(NNN) <sub>4</sub> NN-(T) <sub>15</sub> -SH-3'              |

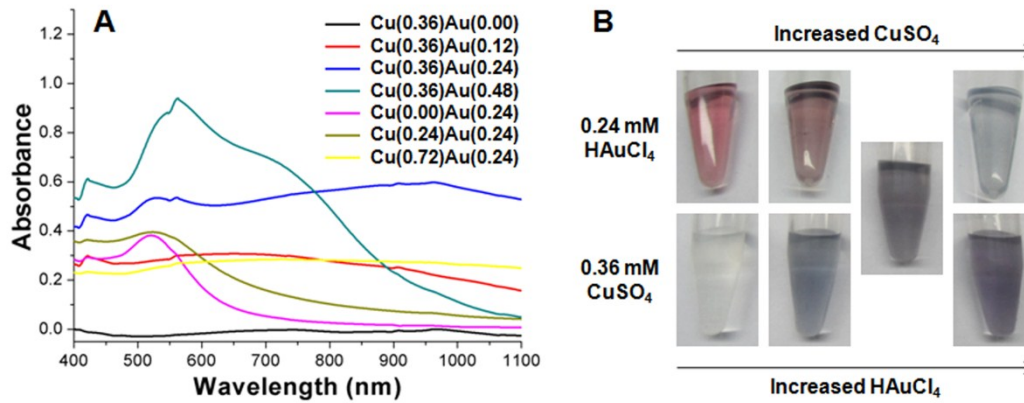

**Figure S1.** Optimization of the concentrations of  $\text{CuSO}_4$  and  $\text{HAuCl}_4$  for preparing Cu-Au alloy nanostructures. (A) Extinction spectra of Cu-Au alloy nanostructures prepared under different concentrations (mM) of  $\text{CuSO}_4$  and  $\text{HAuCl}_4$ . (B) The corresponding photographs showing the color variation of Cu-Au alloy nanostructures prepared with different concentrations of  $\text{CuSO}_4$  and  $\text{HAuCl}_4$ .

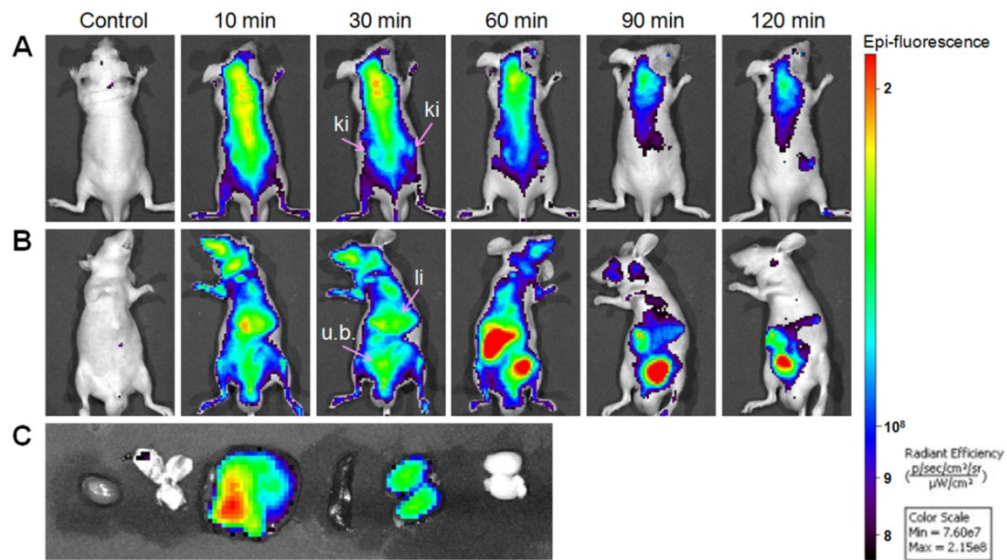

**Figure S2.** Time-lapse *in vivo* fluorescence imaging of Cy5-Sgc8c-coated Cu-Au alloy nanostructures in a normal nude mouse without tumors through an intravenous injection. (A) Backside imaging. (B) Abdomen imaging. (C) Image of some resected organs of a normal nude mouse without tumors after intravenous injection of Cy5-Sgc8c-coated Cu-Au alloy nanostructures for 120 min. From left to right: heart, lung, liver, spleen, kidney, spermary. (li=liver; ki=kidney; u.b.=urinary bladder.)
